# Supplementary material for: Exploring European ancestry among the Kalash population: a mitogenomic perspective
Source: PubMed Central journal article supplement — Zool Res. 2020 Sep 18;41(5):552–6. doi: 10.24272/j.issn.2095-8137.2020.052 (PMC7475010; doi:10.24272/j.issn.2095-8137.2020.052), 2020-09-18
Supplement: zr-41-5-552-S1.pdf [file zr-41-5-552-S1.pdf]

## SUPPLEMENTARY INFORMATION

### Supplementary Materials and Methods

#### Study area and sampling

The Kalash are an enigmatic community living in the Chitral District in Khyber Pakhtunkhwa Province of present-day northern Pakistan. They are a non-Muslim minority and reside in three nearby villages known as the Kalash valleys (Bumburet, Rumbur, and Birir) (E71–40° longitude and N35–40° latitude). Samples from nine maternally unrelated Kalash individuals (Supplementary Figure S2), as well as 11 samples from neighboring populations (one Pashtun and 10 Kho samples) were obtained, as shown in the Supplementary Material as part of our unpublished work. This study was approved by the Ethics Committee at Kunming Institute of Zoology, Chinese Academy of Sciences, China. All procedures were handled in accordance with the Declaration of Helsinki, with informed consent obtained from each participant of the study.

#### Data analysis

Phylogeographic trees of mitogenomes were reconstructed manually and reconfirmed through mt-Phyl software (<https://sites.google.com/site/mtphyl/home>). Variants in the mitogenome sequences were scored relative to the revised Cambridge Reference Sequence (rCRS) (Andrews et al., 1999). The variable lengths in homopolymeric C-stretches in regions 303–315 and AC indels at 515–522, 16 182C, 16 183C, 16 193.1C(C), and 16 519 were disregarded in all phylogenetic reconstructions. The type of each variant was checked by mtDNA-GeneSyn software (Pereira et al., 2009). To estimate coalescent age using rho ( $\rho$ ) and standard error sigma ( $\sigma$ ) statistics (Forster et al., 1996; Saillard et al., 2000), a complete mitogenome rate (Soares et al., 2009) was adopted. New sub-haplogroups were named following the criteria of PhyloTree Build 17 (<http://phylotree.org/>) (van Oven & Kayser, 2009). A reduced median network was constructed based on complete mitogenomes using NETWORK 5.0 ([www.fluxus-engineering.com/sharenet.htm](http://www.fluxus-engineering.com/sharenet.htm)) (Bandelt et al., 1999).

## REFERENCES

- Andrews RM, Kubacka I, Chinnery PF, Lightowlers RN, Turnbull DM, Howell N. 1999. Reanalysis and revision of the Cambridge reference sequence for human mitochondrial DNA. *Nature Genetics*, **23**(2): 147.
- Bandelt HJ, Forster P, Röhl A. 1999. Median-joining networks for inferring intraspecific phylogenies. *Molecular Biology and Evolution*, **16**(1): 37–48.
- Forster P, Harding R, Torroni A, Bandelt HJ. 1996. Origin and evolution of Native American mtDNA variation: a reappraisal. *American Journal of Human Genetics*, **59**(4): 935–945.

Pereira L, Freitas F, Fernandes V, Pereira JB, Costa MD, Costa S, et al. 2009. The diversity present in 5140 human mitochondrial genomes. *The American Journal of Human Genetics*, **84**(5): 628–640.

Saillard J, Forster P, Lynnerup N, Bandelt HJ, Nørby S. 2000. mtDNA variation among Greenland Eskimos: the edge of the Beringian expansion. *American Journal of Human Genetics*, **67**(3): 718–726.

Soares P, Ermini L, Thomson N, Mormina M, Rito T, Röhl A, et al. 2009. Correcting for purifying selection: an improved human mitochondrial molecular clock. *The American Journal of Human Genetics*, **84**(6): 740–759.

van Oven M, Kayser M. 2009. Updated comprehensive phylogenetic tree of global human mitochondrial DNA variation. *Human Mutation*, **30**(2): E386–E394.

## Supplementary Tables

**Supplementary Table S1** Whole mitogenome sequence data from previous literature and our new unpublished data included in present study

| <b>Nation</b>     | <b>Geographic Region</b>   | <b><i>n</i></b> | <b>References</b>                     |
|-------------------|----------------------------|-----------------|---------------------------------------|
| Adygei            | Eastern European & Siberia | 17              | HGDP (Zheng et al., 2014)             |
| Armenian          | Middle East & Caucasus     | 30              | Schönberg et al., 2011                |
| Azeri             | Middle East & Caucasus     | 30              | Schönberg et al., 2011                |
| Balochi           | South Asian                | 25              | HGDP (Zheng et al., 2014)             |
| Basque            | European                   | 20              | Batini et al., 2017                   |
| Bavarian          | European                   | 20              | Batini et al., 2017                   |
| Bedouin           | Middle East & Caucasus     | 48              | HGDP (Zheng et al., 2014)             |
| Bengali           | South Asian                | 86              | Sudmant et al., 2015                  |
| Brahui            | South Asian                | 25              | HGDP (Zheng et al., 2014)             |
| British           | European                   | 91              | Sudmant et al., 2015                  |
| Burusho           | South Asian                | 24              | HGDP (Zheng et al., 2014)             |
| Cambodians        | East/South East Asian      | 8               | HGDP (Zheng et al., 2014)             |
| Chinese Dai       | East/South East Asian      | 98              | Sudmant et al., 2015                  |
| Chinese Han       | East/South East Asian      | 103             | Sudmant et al., 2015                  |
| Kho               | South Asian                | 148             | Our data (Rahman et al., unpublished) |
| Danish            | European                   | 20              | Batini et al., 2017                   |
| Daur              | East/South East Asian      | 10              | HGDP (Zheng et al., 2014)             |
| Druze             | Middle East & Caucasus     | 47              | HGDP (Zheng et al., 2014)             |
| East Pamir Kyrgyz | Central Asian              | 68              | Peng et al., 2018                     |
| English           | European                   | 20              | Batini et al., 2017                   |
| Finnish           | European                   | 99              | Sudmant et al., 2015                  |

|                      |                            |  |     |                           |
|----------------------|----------------------------|--|-----|---------------------------|
| French               | European                   |  | 28  | HGDP (Zheng et al., 2014) |
| Frisian              | European                   |  | 20  | Batini et al., 2017       |
| Georgian             | Middle East & Caucasus     |  | 28  | Schönenberg et al., 2011  |
| Greeks               | Eastern European & Siberia |  | 20  | Batini et al., 2017       |
| Gujrati              | South Asian                |  | 106 | Sudmant et al., 2015      |
| Hazara               | South Asian                |  | 25  | HGDP (Zheng et al., 2014) |
| Hungarian            | Eastern European & Siberia |  | 20  | Batini et al., 2017       |
| Iberian              | European                   |  | 107 | Sudmant et al., 2015      |
| Iranian              | Middle East & Caucasus     |  | 30  | Schönenberg et al., 2011  |
| Iranian- Azeri       | Middle East & Caucasus     |  | 22  | Derenko et al., 2013      |
| Iranian- Bakhtiari   | Middle East & Caucasus     |  | 2   | Derenko et al., 2013      |
| Iranian- Gilak       | Middle East & Caucasus     |  | 2   | Derenko et al., 2013      |
| Iranian- Indian      | Middle East & Caucasus     |  | 1   | Derenko et al., 2013      |
| Iranian- Khalaj      | Middle East & Caucasus     |  | 2   | Derenko et al., 2013      |
| Iranian- Khorasani   | Middle East & Caucasus     |  | 4   | Derenko et al., 2013      |
| Iranian- Kurd        | Middle East & Caucasus     |  | 5   | Derenko et al., 2013      |
| Iranian- Lur         | Middle East & Caucasus     |  | 5   | Derenko et al., 2013      |
| Iranian- Mazandarani | Middle East & Caucasus     |  | 4   | Derenko et al., 2013      |
| Iranian- Persian     | Middle East & Caucasus     |  | 181 | Derenko et al., 2013      |
| Iranian- Qashqai     | Middle East & Caucasus     |  | 112 | Derenko et al., 2013      |

|                  |                            |     |  |                                       |  |
|------------------|----------------------------|-----|--|---------------------------------------|--|
|                  | Caucasus                   |     |  |                                       |  |
| Iranian- Turkmen | Middle East & Caucasus     | 2   |  | Derenko et al., 2013                  |  |
| Iranian-Armenian | Middle East & Caucasus     | 10  |  | Derenko et al., 2013                  |  |
| Irish            | European                   | 20  |  | Batini et al., 2017                   |  |
| Japanese         | East/South East Asian      | 104 |  | Sudmant et al., 2015                  |  |
| Kalash           | South Asian                | 9   |  | Our data (Rahman et al., unpublished) |  |
| Kalash           | South Asian                | 25  |  | HGDP (Zheng et al., 2014)             |  |
| Kashmiri         | South Asian                | 78  |  | Sharma et al., 2018                   |  |
| Kinh             | East/South East Asian      | 99  |  | Sudmant et al., 2015                  |  |
| Lipka Tatars     | Eastern European & Siberia | 11  |  | Pankratov et al., 2016                |  |
| Lowland Kyrgyz   | Central Asian              | 54  |  | Peng et al., 2018                     |  |
| Lowland Tajik    | Central Asian              | 28  |  | Peng et al., 2018                     |  |
| Lowland Uygur    | East/South East Asian      | 27  |  | Peng et al., 2018                     |  |
| Makrani          | South Asian                | 24  |  | HGDP (Zheng et al., 2014)             |  |
| Mongols          | East/South East Asian      | 10  |  | HGDP (Zheng et al., 2014)             |  |
| Norwegian        | European                   | 20  |  | Batini et al., 2017                   |  |
| Orcadian         | European                   | 16  |  | HGDP (Zheng et al., 2014)             |  |
| Orcadian         | European                   | 20  |  | Batini et al., 2017                   |  |
| Palestinian      | Middle East & Caucasus     | 50  |  | HGDP (Zheng et al., 2014)             |  |
| Palestinian      | Middle East & Caucasus     | 20  |  | Batini et al., 2017                   |  |
| Pamiri Tajik     | Central Asian              | 50  |  | Peng et al., 2018                     |  |
| Pathan           | South Asian                | 52  |  | Our data (Rahman et al., unpublished) |  |
| Pathan           | South Asian                | 21  |  | HGDP (Zheng et al., 2014)             |  |
| Polish           | Eastern European & Siberia | 100 |  | Malyarchuk et al., 2017               |  |

|                  |     |                            |  |      |                           |
|------------------|-----|----------------------------|--|------|---------------------------|
| Punjabi-Pakistan |     | South Asian                |  | 96   | Sudmant et al., 2015      |
| Russian          |     | Eastern European & Siberia |  | 41   | Malyarchuk et al., 2017   |
| Russian          |     | Eastern European & Siberia |  | 46   | Malyarchuk et al., 2017   |
| Russian          |     | Eastern European & Siberia |  | 45   | Malyarchuk et al., 2017   |
| Russian          |     | Eastern European & Siberia |  | 51   | Malyarchuk et al., 2017   |
| Russian          |     | Eastern European & Siberia |  | 45   | Malyarchuk et al., 2017   |
| Russian          |     | Eastern European & Siberia |  | 61   | Malyarchuk et al., 2017   |
| Russian          |     | Eastern European & Siberia |  | 25   | HGDP (Zheng et al., 2014) |
| Saami            |     | European                   |  | 20   | Batini et al., 2017       |
| Sardinian        |     | European                   |  | 2092 | Olivieri et al., 2017     |
| Sarikoli Tajik   |     | Central Asian              |  | 86   | Peng et al., 2018         |
| Serbian          |     | European                   |  | 20   | Batini et al., 2017       |
| Sherpa           |     | East/South East Asian      |  | 76   | Kang et al., 2013         |
| Sindhi           |     | South Asian                |  | 25   | HGDP (Zheng et al., 2014) |
| Southern Chinese | Han | East/South East Asian      |  | 104  | Sudmant et al., 2015      |
| Spanish          |     | European                   |  | 20   | Batini et al., 2017       |
| Srilankan Tamil  |     | South Asian                |  | 102  | Sudmant et al., 2015      |
| Telugu           |     | South Asian                |  | 103  | Sudmant et al., 2015      |
| Toscani          |     | European                   |  | 107  | Sudmant et al., 2015      |
| Turkish          |     | Middle East & Caucasus     |  | 29   | Schönberg et al., 2011    |
| Turkish          |     | Middle East & Caucasus     |  | 20   | Batini et al., 2017       |
| Utah             |     | European                   |  | 61   | Sudmant et al., 2015      |

|                   |                            |     |                           |
|-------------------|----------------------------|-----|---------------------------|
| Uyghur            | East/South East Asian      | 9   | HGDP (Zheng et al., 2014) |
| Wakhi Tajik       | Central Asian              | 66  | Peng et al., 2018         |
| West Pamir Kyrgyz | Central Asian              | 3   | Peng et al., 2018         |
| Xibo              | East/South East Asian      | 8   | HGDP (Zheng et al., 2014) |
| Yakut             | Eastern European & Siberia | 24  | HGDP (Zheng et al., 2014) |
| Yemni             | Middle East & Caucasus     | 113 | Vyas et al., 2016         |

---

## REFERENCES

- Batini C, Hallast P, Vågane ÅJ, Zadik D, Eriksen HA, Pamjav H, et al. 2017. Population resequencing of European mitochondrial genomes highlights sex-bias in Bronze Age demographic expansions. *Scientific Reports*, **7**(1): 12086.
- Derenko M, Malyarchuk B, Bahmanimehr A, Denisova G, Perkova M, Farjadian S, et al. 2013. Complete mitochondrial DNA diversity in Iranians. *PLoS One*, **8**(11): e80673.
- Kang LL, Zheng HX, Chen F, Yan S, Liu K, Qin ZD, et al. 2013. mtDNA lineage expansions in Sherpa population suggest adaptive evolution in Tibetan highlands. *Molecular Biology and Evolution*, **30**(12): 2579–2587.
- Malyarchuk B, Litvinov A, Derenko M, Skonieczna K, Grzybowski T, Grosheva A, et al. 2017. Mitogenomic diversity in Russians and Poles. *Forensic Science International: Genetics*, **30**: 51–56.
- Olivieri A, Sidore C, Achilli A, Angius A, Posth C, Furtwängler A, et al. 2017. Mitogenome diversity in Sardinians: a genetic window onto an Island's Past. *Molecular Biology and Evolution*, **34**(5): 1230–1239.
- Pankratov V, Litvinov S, Kassian A, Shulhin D, Tchebotarev L, Yunusbayev B, et al. 2016. East Eurasian ancestry in the middle of Europe: genetic footprints of Steppe nomads in the genomes of Belarusian Lipka Tatars. *Scientific Reports*, **6**(1): 30197.
- Peng MS, Xu WF, Song JJ, Chen X, Sulaiman X, Cai LH, et al. 2018. Mitochondrial genomes uncover the maternal history of the Pamir populations. *European Journal of Human Genetics*, **26**(1): 124–136.
- Schönberg A, Theunert C, Li MK, Stoneking M, Nasidze I. 2011. High-throughput sequencing of complete human mtDNA genomes from the Caucasus and West Asia: high diversity and demographic inferences. *European Journal of Human Genetics*, **19**(9): 988–994.
- Sharma I, Sharma V, Khan A, Kumar P, Rai E, Bamezai RNK, et al. 2018. Ancient human migrations to and through Jammu Kashmir- India were not of males exclusively. *Scientific*

*Reports*, **8**(1): 851.

Sudmant PH, Rausch T, Gardner EJ, Handsaker RE, Abyzov A, Huddleston J, et al. 2015. An integrated map of structural variation in 2, 504 human genomes. *Nature*, **526**(7571): 75–81.

Vyas DN, Kitchen A, Miró-Herrans AT, Pearson LN, Al-Meerri A, Mulligan CJ. 2016. Bayesian analyses of Yemeni mitochondrial genomes suggest multiple migration events with Africa and Western Eurasia. *American Journal of Physical Anthropology*, **159**(3): 382–393.

Zheng HX, Qin ZD, Jin L, Jin L. 2014. The mitochondrial DNA diversity of HGDP populations. Direct Submission.



**Supplementary Table S2** Accession numbers and information of mitogenome sequences used for phylogeographic reconstruction of haplogroups in Kalash population

| <b>Code</b> | <b>Accession number/ID</b> | <b>Geographic origin</b> | <b>References</b>                     |
|-------------|----------------------------|--------------------------|---------------------------------------|
| 52          | MN595769/CHM192            | South Asia               | Our data (Rahman et al., unpublished) |
| 49          | MN595685/CHF101            | South Asia               | Our data (Rahman et al., unpublished) |
| 55          | MN595749/CHF85             | South Asia               | Our data (Rahman et al., unpublished) |
| 54          | MN595765/CHM120            | South Asia               | Our data (Rahman et al., unpublished) |
| 56          | MN595818/CHM90             | South Asia               | Our data (Rahman et al., unpublished) |
| 2           | MN595718/CHF184            | South Asia               | Our data (Rahman et al., unpublished) |
| 97          | MN595807/CHM71             | South Asia               | Our data (Rahman et al., unpublished) |
| 93          | MN595706/CHF160            | South Asia               | Our data (Rahman et al., unpublished) |
| 141         | MN595751/CHF96             | South Asia               | Our data (Rahman et al., unpublished) |
| 138         | MN595890/PAM317            | South Asia               | Our data (Rahman et al., unpublished) |
| 132         | MN595820/CHM92             | South Asia               | Our data (Rahman et al., unpublished) |
| 127         | JX462724                   | South Asia               | Khan et al., 2012                     |
| 136         | KF450841                   | South Asia               | Lippold et al., 2014                  |
| 73          | AY714022. 1                | South Asia               | Palanichamy et al., 2004              |
| 108         | KF450905. 1                | South Asia               | Lippold et al., 2014                  |
| 53          | KAM4                       | South Asia               | Our data (Rahman et al., unpublished) |
| 7           | KAM7                       | South Asia               | Our data (Rahman et al., unpublished) |
| 8           | KAM9                       | South Asia               | Our data (Rahman et al., unpublished) |
| 117         | KAM6                       | South Asia               | Our data (Rahman et al., unpublished) |
| 145         | KAM8                       | South Asia               | Our data (Rahman et al., unpublished) |
| 146         | KAM5                       | South Asia               | Our data (Rahman et al., unpublished) |
| 163         | KAF12                      | South Asia               | Our data (Rahman et al., unpublished) |
| 57          | KF450963                   | South Asia               | Lippold et al., 2014                  |
| 12          | KF450971. 1                | South Asia               | Lippold et al., 2014                  |
| 9           | KF450972. 1                | South Asia               | Lippold et al., 2014                  |

|     |             |                 |                       |
|-----|-------------|-----------------|-----------------------|
| 10  | KF450974. 1 | South Asia      | Lippold et al., 2014  |
| 11  | KF450982. 1 | South Asia      | Lippold et al., 2014  |
| 14  | EU597493. 1 | South Asia      | Hartmann et al., 2009 |
| 20  | KF450968. 1 | South Asia      | Lippold et al., 2014  |
| 19  | KF450986. 1 | South Asia      | Lippold et al., 2014  |
| 16  | KF450967. 1 | South Asia      | Lippold et al., 2014  |
| 15  | KF450980. 1 | South Asia      | Lippold et al., 2014  |
| 83  | KF450975. 1 | South Asia      | Lippold et al., 2014  |
| 95  | KF450979. 1 | South Asia      | Lippold et al., 2014  |
| 94  | KF450984. 1 | South Asia      | Lippold et al., 2014  |
| 92  | KF450983. 1 | South Asia      | Lippold et al., 2014  |
| 142 | KF450977    | South Asia      | Lippold et al., 2014  |
| 143 | KF450978    | South Asia      | Lippold et al., 2014  |
| 144 | EU597564    | South Asia      | Hartmann et al., 2009 |
| 147 | KF450973    | South Asia      | Lippold et al., 2014  |
| 140 | KF450976    | South Asia      | Lippold et al., 2014  |
| 133 | EU597575    | South Asia      | Hartmann et al., 2009 |
| 162 | KF450970. 1 | South Asia      | Lippold et al., 2014  |
| 113 | JX462708    | South Asia      | Khan et al., 2012     |
| 126 | KC990673    | South Asia      | Ramanan et al., 2013  |
| 59  | MF523044    | Central<br>Asia | Peng et al., 2018     |
| 60  | MF523045    | Central<br>Asia | Peng et al., 2018     |
| 61  | MF523046    | Central<br>Asia | Peng et al., 2018     |
| 58  | MF523052    | Central<br>Asia | Peng et al., 2018     |
| 68  | MF523033    | Central<br>Asia | Peng et al., 2018     |
| 100 | MF523063. 1 | Central         | Peng et al., 2018     |

|     |             |              |                     |
|-----|-------------|--------------|---------------------|
|     |             | Asia         |                     |
| 128 | KX675279    | Central Asia | Marchi et al., 2017 |
| 155 | MF522979. 1 | Central Asia | Peng et al., 2018   |
| 98  | MF523059    | Central Asia | Peng et al., 2018   |
| 99  | MF523064. 1 | Central Asia | Peng et al., 2018   |
| 96  | MF523030    | Central Asia | Peng et al., 2018   |
| 112 | MF523127.1  | East Asia    | Peng et al., 2018   |
| 21  | MF522857    | East Asia    | Peng et al., 2018   |
| 22  | MF523082    | East Asia    | Peng et al., 2018   |
| 23  | MF523123    | East Asia    | Peng et al., 2018   |
| 24  | MF523124    | East Asia    | Peng et al., 2018   |
| 25  | MF523132    | East Asia    | Peng et al., 2018   |
| 26  | MF523135    | East Asia    | Peng et al., 2018   |
| 27  | MF523182    | East Asia    | Peng et al., 2018   |
| 28  | MF523202    | East Asia    | Peng et al., 2018   |
| 50  | MF523165    | East Asia    | Peng et al., 2018   |
| 51  | MF523217    | East Asia    | Peng et al., 2018   |
| 69  | MF522925    | East Asia    | Peng et al., 2018   |
| 29  | MF523180    | East Asia    | Peng et al., 2018   |
| 30  | MF523206    | East Asia    | Peng et al., 2018   |
| 17  | MF523176. 1 | East Asia    | Peng et al., 2018   |
| 18  | MF523220. 1 | East Asia    | Peng et al., 2018   |
| 91  | MF522922. 1 | East Asia    | Peng et al., 2018   |
| 107 | KF849954. 1 | East Asia    | Jiang et al., 2014  |
| 110 | KU683218. 1 | East Asia    | Zheng et al., 2017  |
| 111 | KU683284. 1 | East Asia    | Zheng et al., 2017  |

|     |             |                                |                         |
|-----|-------------|--------------------------------|-------------------------|
| 101 | MF523188. 1 | East Asia                      | Peng et al., 2018       |
| 102 | MF523134. 1 | East Asia                      | Peng et al., 2018       |
| 137 | MF522903    | East Asia                      | Peng et al., 2018       |
| 134 | MF523077    | East Asia                      | Peng et al., 2018       |
| 135 | MF523119    | East Asia                      | Peng et al., 2018       |
| 152 | MG952837. 1 | East Asia                      | Malyarchuk et al., 2018 |
| 158 | KU682886. 1 | East Asia                      | Zheng et al., 2017      |
| 159 | KU682905. 1 | East Asia                      | Zheng et al., 2017      |
| 160 | KU682920    | East Asia                      | Zheng et al., 2017      |
| 161 | KU682931    | East Asia                      | Zheng et al., 2017      |
| 37  | HM852854    | Middle<br>East and<br>Caucasus | Schönberg et al., 2011  |
| 5   | KX499665. 1 | Middle<br>East and<br>Caucasus | Greenspan, FTDNA        |
| 4   | KP407079. 1 | Middle<br>East and<br>Caucasus | Gandini et al., 2016    |
| 13  | KP407080. 1 | Middle<br>East and<br>Caucasus | Gandini et al., 2016    |
| 1   | KJ716336. 1 | Middle<br>East and<br>Caucasus | Greenspan, FTDNA        |
| 89  | JQ798052. 1 | Middle<br>East and<br>Caucasus | Pala et al., 2012       |
| 84  | AY495304. 1 | Middle<br>East and<br>Caucasus | Coble et al., 2004      |
| 131 | HM852776    | Middle<br>East and<br>Caucasus | Schönberg et al., 2011  |

|     |            |                            |                         |
|-----|------------|----------------------------|-------------------------|
| 157 | KC911400.1 | Middle East and Caucasus   | Derenko et al., 2013    |
| 72  | AY495298.1 | Middle East and Caucasus   | Coble et al., 2004      |
| 64  | KY670917   | Eastern Europe and Siberia | Malyarchuk et al., 2017 |
| 31  | KJ856689   | Eastern Europe and Siberia | Derenko et al., 2014    |
| 32  | KJ856717   | Eastern Europe and Siberia | Derenko et al., 2014    |
| 33  | KJ856745   | Eastern Europe and Siberia | Derenko et al., 2014    |
| 82  | FJ656215.1 | Eastern Europe and Siberia | Rogaev et al., 2009     |
| 109 | FJ493504.1 | Eastern Europe and Siberia | Sukernik et al., 2012   |
| 139 | KJ856729   | Eastern Europe and Siberia | Derenko et al., 2014    |
| 118 | MG597495   | Eastern Europe and Siberia | Greenspan, FTDNA        |
| 151 | FJ147313.1 | Eastern Europe and Siberia | Sukernik et al., 2012   |
| 156 | FJ147316.1 | Eastern Europe and Siberia | Sukernik et al., 2012   |
| 153 | FJ147314.1 | Eastern Europe and         | Sukernik et al., 2012   |

|     |             |         |                             |
|-----|-------------|---------|-----------------------------|
|     |             | Siberia |                             |
| 63  | KF162320    | Europe  | Li et al., 2014             |
| 48  | KY646099    | Europe  | Greenspan, FTDNA            |
| 36  | KF162914    | Europe  | Li et al., 2014             |
| 35  | KY399164    | Europe  | Olivieri et al., 2017       |
| 43  | KM016488    | Europe  | Greenspan, FTDNA            |
| 34  | AY339428    | Europe  | Moilanen et al., 2003       |
| 3   | KP407078. 1 | Europe  | Gandini et al., 2016        |
| 6   | KF055865. 1 | Europe  | Gómez-Carballa et al., 2013 |
| 90  | JQ798053. 1 | Europe  | Pala et al., 2012           |
| 88  | JX297195. 1 | Europe  | Cardoso et al., 2013        |
| 87  | JX297194. 1 | Europe  | Cardoso et al., 2013        |
| 77  | KF161904. 1 | Europe  | Li et al., 2014             |
| 106 | EF660957. 1 | Europe  | Gasparre et al., 2007       |
| 105 | KF161734. 1 | Europe  | Li et al., 2014             |
| 104 | JN581653. 1 | Europe  | Bertolin et al., 2011       |
| 103 | KJ856797. 1 | Europe  | Derenko et al., 2014        |
| 115 | KF161136. 1 | Europe  | Li et al., 2014             |
| 116 | MG952848. 1 | Europe  | Malyarchuk et al., 2018     |
| 130 | KF161730    | Europe  | Li et al., 2014             |
| 129 | KF161522    | Europe  | Li et al., 2014             |
| 124 | KF161073    | Europe  | Li et al., 2014             |
| 123 | KF161338    | Europe  | Li et al., 2014             |
| 122 | KF162533    | Europe  | Li et al., 2014             |
| 121 | KF451618    | Europe  | Lippold et al., 2014        |
| 125 | KP733895    | Europe  | Greenspan, FTDNA            |
| 120 | MG669471    | Europe  | Greenspan, FTDNA            |
| 119 | KF161335    | Europe  | Li et al., 2014             |
| 154 | MG952787. 1 | Europe  | Malyarchuk et al., 2018     |

|     |             |                |                       |
|-----|-------------|----------------|-----------------------|
| 70  | JN383991. 1 | Europe         | Greenspan, FTDNA      |
| 71  | KC137255. 1 | Europe         | Greenspan, FTDNA      |
| 67  | HQ667351    | Out of Eurasia | Greenspan, FTDNA      |
| 42  | FJ668389    | Out of Eurasia | Greenspan, FTDNA      |
| 66  | JQ702059    | unknown        | Behar et al., 2012    |
| 65  | JQ703017    | unknown        | Behar et al., 2012    |
| 62  | JQ703213    | unknown        | Behar et al., 2012    |
| 45  | MF497500    | unknown        | Järviaho et al., 2018 |
| 44  | JQ702397    | unknown        | Behar et al., 2012    |
| 47  | MF497516    | unknown        | Järviaho et al., 2018 |
| 46  | MF497515    | unknown        | Järviaho et al., 2018 |
| 40  | JQ703144    | unknown        | Behar et al., 2012    |
| 41  | JQ705852    | unknown        | Behar et al., 2012    |
| 39  | JQ704579    | unknown        | Behar et al., 2012    |
| 38  | KJ801443    | unknown        | Lang et al., 2015     |
| 86  | JQ702379. 1 | unknown        | Behar et al., 2012    |
| 85  | JQ702594. 1 | unknown        | Behar et al., 2012    |
| 81  | JQ702611. 1 | unknown        | Behar et al., 2012    |
| 80  | JQ705057. 1 | unknown        | Behar et al., 2012    |
| 79  | JQ705133. 1 | unknown        | Behar et al., 2012    |
| 78  | JQ703890. 1 | unknown        | Behar et al., 2012    |
| 74  | JQ702969. 1 | unknown        | Behar et al., 2012    |
| 76  | JQ706008. 1 | unknown        | Behar et al., 2012    |
| 75  | JQ703088. 1 | unknown        | Behar et al., 2012    |
| 149 | JQ704215    | unknown        | Behar et al., 2012    |
| 150 | JQ703947    | unknown        | Behar et al., 2012    |
| 148 | JQ703903    | unknown        | Behar et al., 2012    |
| 114 | JQ705900    | unknown        | Behar et al., 2012    |

---

## REFERENCES

- Behar DM, van Oven M, Rosset S, Metspalu M, Loogväli EL, Silva NM, et al. 2012. A “Copernican” reassessment of the human mitochondrial DNA tree from its root. *The American Journal of Human Genetics*, **90**(4): 675–684.
- Bertolin C, Magri C, Barlati S, Vettori A, Perini GI, Peruzzi P, et al. 2011. Analysis of complete mitochondrial genomes of patients with schizophrenia and bipolar disorder. *Journal of Human Genetics*, **56**(12): 869–872.
- Cardoso S, Valverde L, Alfonso-Sánchez MA, Palencia-Madrid L, Elcoroaristizabal X, Algorta J, et al. 2013. The expanded mtDNA phylogeny of the Franco-Cantabrian region upholds the pre-neolithic genetic substrate of Basques. *PLoS One*, **8**(7): e67835.
- Coble MD, Just RS, O’Callaghan JE, Letmanyi IH, Peterson CT, Irwin JA, et al. 2004. Single nucleotide polymorphisms over the entire mtDNA genome that increase the power of forensic testing in Caucasians. *International Journal of Legal Medicine*, **118**(3): 137–146.
- Derenko M, Malyarchuk B, Bahmanimehr A, Denisova G, Perkova M, Farjadian S, et al. 2013. Complete mitochondrial DNA diversity in Iranians. *PLoS One*, **8**(11): e80673.
- Derenko M, Malyarchuk B, Denisova G, Perkova M, Litvinov A, Grzybowski T, et al. 2014. Western Eurasian ancestry in modern Siberians based on mitogenomic data. *BMC Evolutionary Biology*, **14**(1): 217.
- Gandini F, Achilli A, Pala M, Bodner M, Brandini S, Huber G, et al. 2016. Mapping human dispersals into the Horn of Africa from Arabian Ice Age refugia using mitogenomes. *Scientific Reports*, **6**(1): 25472.
- Gasparre G, Porcelli AM, Bonora E, Pennisi LF, Toller M, Iommarini L, et al. 2007. Disruptive mitochondrial DNA mutations in complex I subunits are markers of oncocyctic phenotype in thyroid tumors. *Proceedings of the National Academy of Sciences of the United States of America*, **104**(21): 9001–9006.
- Gómez-Carballa A, Pardo-Seco J, Fachal L, Vega A, Cebey M, Martínón-Torres N, et al. 2013. Indian Signatures in the westernmost edge of the European Romani diaspora: new insight from Mitogenomes. *PLoS One*, **8**(10): e75397.
- Greenspan B. Direct submission. Family Tree DNA. (<http://www.ncbi.nlm.nih.gov/>)
- Hartmann A, Thieme M, Nanduri LK, Stempf T, Moehle C, Kivisild T, et al. 2009. Validation of microarray-based resequencing of 93 worldwide mitochondrial genomes. *Human Mutation*, **30**(1): 115–122.
- Järviäho T, Hurme-Niiranen A, Soini HK, Niinimäki R, Möttönen M, Savolainen ER, et al. 2018. Novel non-neutral mitochondrial DNA mutations found in childhood acute lymphoblastic leukemia. *Clinical Genetics*, **93**(2): 275–285.



Jiang CH, Cui JH, Liu FY, Gao L, Luo YJ, Li P, et al. 2014. Mitochondrial DNA 10609T promotes hypoxia-induced increase of intracellular ROS and is a risk factor of high altitude polycythemia. *PLoS One*, **9**(1): e87775.

Khan NA, Govindaraj P, Thangaraj K. 2012. Occurrence of G11778A LHON mutation in diverse mitochondrial haplogroups in Indian population. (Unpublished).

Lang M, Vocke CD, Merino MJ, Schmidt LS, Linehan WM. 2015. Mitochondrial DNA mutations distinguish bilateral multifocal renal oncocytomas from familial Birt-Hogg-Dubé tumors. *Modern Pathology*, **28**(11): 1458–1469.

Li ST, Besenbacher S, Li YR, Kristiansen K, Grarup N, Albrechtsen A, et al. 2014. Variation and association to diabetes in 2000 full mtDNA sequences mined from an exome study in a Danish population. *European Journal of Human Genetics*, **22**(8): 1040–1045.

Lippold S, Xu HY, Ko A, Li MK, Renaud G, Butthof A, et al. 2014. Human paternal and maternal demographic histories: insights from high-resolution Y chromosome and mtDNA sequences. *Investigative Genetics*, **5**: 13.

Malyarchuk B, Litvinov A, Derenko M, Skonieczna K, Grzybowski T, Grosheva A, et al. 2017. Mitogenomic diversity in Russians and Poles. *Forensic Science International: Genetics*, **30**: 51–56.

Malyarchuk B, Derenko M, Denisova G, Litvinov A, Rogalla U, Skonieczna K, et al. 2018. Whole mitochondrial genome diversity in two Hungarian populations. *Molecular Genetics and Genomics*, **293**(5): 1255–1263.

Marchi N, Hegay T, Menecier P, Georges M, Laurent R, Whitten M, et al. 2017. Sex-specific genetic diversity is shaped by cultural factors in Inner Asian human populations. *American Journal of Physical Anthropology*, **162**(4): 627–640.

Moilanen JS, Finnilä S, Majamaa K. 2003. Lineage-specific selection in human mtDNA: lack of polymorphisms in a segment of MTND5 gene in Haplogroup J. *Molecular Biology and Evolution*, **20**(12): 2132–2142.

Olivieri A, Sidore C, Achilli A, Angius A, Posth C, Furtwängler A, et al. 2017. Mitogenome diversity in Sardinians: a genetic window onto an Island's past. *Molecular Biology and Evolution*, **34**(5): 1230–1239.

Pala M, Olivieri A, Achilli A, Accetturo M, Metspalu E, Reidla M, et al. 2012. Mitochondrial DNA signals of late glacial recolonization of Europe from near eastern refugia. *The American Journal of Human Genetics*, **90**(5): 915–924.

Palanichamy MG, Sun C, Agrawal S, Bandelt HJ, Kong QP, Khan F, et al. 2004. Phylogeny of mitochondrial DNA macrohaplogroup N in India, based on complete sequencing: implications for the peopling of South Asia. *The American Journal of Human Genetics*, **75**(6): 966–978.

Peng MS, Xu WF, Song JJ, Chen X, Sulaiman X, Cai LH, et al. 2018. Mitochondrial genomes uncover the maternal history of the Pamir populations. *European Journal of Human Genetics*, **26**(1): 124–136.

Ramanan D, Rani B, Govindaraj P, Sharma R, Rastogi B, Thangaraj K, et al. 2013. Spectrum of mitochondrial mutations in Non-syndromic hearing loss in North Indian Cohort. (Unpublished).

Rogaev EI, Grigorenko AP, Moliaka YK, Faskhutdinova G, Goltsov A, Lahti A, et al. 2009. Genomic identification in the historical case of the Nicholas II royal family. *Proceedings of the National Academy of Sciences of the United States of America*, **106**(13): 5258–5263.

Schönberg A, Theunert C, Li MK, Stoneking M, Nasidze I. 2011. High-throughput sequencing of complete human mtDNA genomes from the Caucasus and West Asia: high diversity and demographic inferences. *European Journal of Human Genetics*, **19**(9): 988–994.

Sukernik RI, Volodko NV, Mazunin IO, Eltsov NP, Dryomov SV, Starikovskaya EB. 2012. Mitochondrial genome diversity in the tubalar, even, and ulchi: contribution to prehistory of native Siberians and their affinities to native Americans. *American Journal of Physical Anthropology*, **148**(1): 123–138.

Zheng HX, Li L, Jiang XY, Yan S, Qin ZD, Wang XF, et al. 2017. MtDNA genomes reveal a relaxation of selective constraints in low-BMI individuals in a Uyghur population. *Human Genetics*, **136**(10): 1353–1362.

**Supplementary Table S3** GenBank accession Nos. and information of mitogenome sequences used for phylogeographic reconstruction of J2b1a using reduced median-joining network. Accession numbers of ancient mitogenomes are in italics

| <b>GenBank accession No./ID</b> | <b>Haplogroup</b> | <b>Country</b> | <b>Geographic region</b> | <b>References</b>                     |
|---------------------------------|-------------------|----------------|--------------------------|---------------------------------------|
| KAF1                            | J2b1a             | North Pakistan | South Asia               | Our data (Rahman et al., unpublished) |
| KAM2                            | J2b1a             | North Pakistan | South Asia               | Our data (Rahman et al., unpublished) |
| DQ341090. 1                     | J2b1a             | Italy          | Europe                   | Carelli et al., 2006                  |
| DQ523671. 1                     | J2b1a             | Sardinia       | Europe                   | Fraumene et al., 2006                 |
| EU597520. 1                     | J2b1a             | Sardinia       | Europe                   | Hartmann et al., 2009                 |
| EU673448. 1                     | J2b1a             | NA             | NA                       | Greenspan, FTDNA                      |

|             |       |                |            |                          |
|-------------|-------|----------------|------------|--------------------------|
| JF915700. 1 | J2b1a | Ireland        | Europe     | Greenspan, FTDNA         |
| JN635304. 1 | J2b1a | NA             | NA         | Pacheu-Grau et al., 2013 |
| JQ702196. 1 | J2b1a | NA             | NA         | Behar et al., 2012       |
| JQ702199. 1 | J2b1a | NA             | NA         | Behar et al., 2012       |
| JQ702442. 1 | J2b1a | NA             | NA         | Behar et al., 2012       |
| JQ702477. 1 | J2b1a | NA             | NA         | Behar et al., 2012       |
| JQ702553. 1 | J2b1a | NA             | NA         | Behar et al., 2012       |
| JQ702593. 1 | J2b1a | NA             | NA         | Behar et al. 2012        |
| JQ702758. 1 | J2b1a | NA             | NA         | Behar et al., 2012       |
| JQ703517. 1 | J2b1a | NA             | NA         | Behar et al., 2012       |
| JQ705925. 1 | J2b1a | NA             | NA         | Behar et al., 2012       |
| JQ797939. 1 | J2b1a | Italy          | Europe     | Pala et al., 2012        |
| JQ797942. 1 | J2b1a | Morocco        | Others     | Pala et al., 2012        |
| JQ797947. 1 | J2b1a | Italy          | Europe     | Pala et al., 2012        |
| JQ797948. 1 | J2b1a | Italy          | Europe     | Pala et al., 2012        |
| JX152794. 1 | J2b1a | Denmark        | Europe     | Raule et al., 2014       |
| JX153193. 1 | J2b1a | Finland        | Europe     | Raule et al., 2014       |
| JX153750. 1 | J2b1a | Denmark        | Europe     | Raule et al., 2014       |
| KF161080. 1 | J2b1a | Denmark        | Europe     | Li et al., 2014          |
| KF161168. 1 | J2b1a | Denmark        | Europe     | Li et al., 2014          |
| KF161362. 1 | J2b1a | Denmark        | Europe     | Li et al., 2014          |
| KF161505. 1 | J2b1a | Denmark        | Europe     | Li et al., 2014          |
| KF161527. 1 | J2b1a | Denmark        | Europe     | Li et al., 2014          |
| KF450954. 1 | J2b1a | North Pakistan | South Asia | Lippold et al., 2014     |
| KF450956. 1 | J2b1a | North Pakistan | South Asia | Lippold et al., 2014     |
| KF450962. 1 | J2b1a | North Pakistan | South Asia | Lippold et al., 2014     |
| KF450969. 1 | J2b1a | North Pakistan | South Asia | Lippold et al., 2014     |
| KF450981. 1 | J2b1a | North Pakistan | South Asia | Lippold et al., 2014     |

|             |       |                |            |                       |
|-------------|-------|----------------|------------|-----------------------|
| KF450985. 1 | J2b1a | North Pakistan | South Asia | Lippold et al., 2014  |
| KF451585. 1 | J2b1a | Sardinia       | Europe     | Lippold et al., 2014  |
| KM101817. 1 | J2b1a | America        | Others     | Just et al., 2015     |
| KM101927. 1 | J2b1a | America        | Others     | Just et al., 2015     |
| KM101985. 1 | J2b1a | America        | Others     | Just et al., 2015     |
| KX440268. 1 | J2b1a | Morocco        | Others     | Pereira et al., 2017  |
| KX440269. 1 | J2b1a | Tunisia        | Others     | Pereira et al., 2017  |
| KX440270. 1 | J2b1a | Morocco        | Others     | Pereira et al., 2017  |
| KY399150. 1 | J2b1a | Sardinia       | Europe     | Olivieri et al., 2017 |
| KY399160. 1 | J2b1a | Sardinia       | Europe     | Olivieri et al., 2017 |
| KY408236. 1 | J2b1a | Sardinia       | Europe     | Olivieri et al., 2017 |
| KY408253. 1 | J2b1a | Sardinia       | Europe     | Olivieri et al., 2017 |
| KY408272. 1 | J2b1a | Sardinia       | Europe     | Olivieri et al., 2017 |
| KY408304. 1 | J2b1a | Sardinia       | Europe     | Olivieri et al., 2017 |
| KY408322. 1 | J2b1a | Sardinia       | Europe     | Olivieri et al., 2017 |
| KY408330. 1 | J2b1a | Sardinia       | Europe     | Olivieri et al., 2017 |
| KY408334. 1 | J2b1a | Sardinia       | Europe     | Olivieri et al., 2017 |
| KY408342. 1 | J2b1a | Sardinia       | Europe     | Olivieri et al., 2017 |
| KY408345. 1 | J2b1a | Sardinia       | Europe     | Olivieri et al., 2017 |
| KY408364. 1 | J2b1a | Sardinia       | Europe     | Olivieri et al., 2017 |
| KY408367. 1 | J2b1a | Sardinia       | Europe     | Olivieri et al., 2017 |
| KY408382. 1 | J2b1a | Sardinia       | Europe     | Olivieri et al., 2017 |
| KY408391. 1 | J2b1a | Sardinia       | Europe     | Olivieri et al., 2017 |
| KY408414. 1 | J2b1a | Sardinia       | Europe     | Olivieri et al., 2017 |
| KY408425. 1 | J2b1a | Sardinia       | Europe     | Olivieri et al., 2017 |
| KY408441. 1 | J2b1a | Sardinia       | Europe     | Olivieri et al., 2017 |
| KY408449. 1 | J2b1a | Sardinia       | Europe     | Olivieri et al., 2017 |
| KY408469. 1 | J2b1a | Sardinia       | Europe     | Olivieri et al., 2017 |
| KY408507. 1 | J2b1a | Sardinia       | Europe     | Olivieri et al., 2017 |

|             |       |          |        |                       |
|-------------|-------|----------|--------|-----------------------|
| KY408562. 1 | J2b1a | Sardinia | Europe | Olivieri et al., 2017 |
| KY408599. 1 | J2b1a | Sardinia | Europe | Olivieri et al., 2017 |
| KY408728. 1 | J2b1a | Sardinia | Europe | Olivieri et al., 2017 |
| KY408803. 1 | J2b1a | Sardinia | Europe | Olivieri et al., 2017 |
| KY408858. 1 | J2b1a | Sardinia | Europe | Olivieri et al., 2017 |
| KY408875. 1 | J2b1a | Sardinia | Europe | Olivieri et al., 2017 |
| KY408958. 1 | J2b1a | Sardinia | Europe | Olivieri et al., 2017 |
| KY408969. 1 | J2b1a | Sardinia | Europe | Olivieri et al., 2017 |
| KY409023. 1 | J2b1a | Sardinia | Europe | Olivieri et al., 2017 |
| KY409032. 1 | J2b1a | Sardinia | Europe | Olivieri et al., 2017 |
| KY409051. 1 | J2b1a | Sardinia | Europe | Olivieri et al., 2017 |
| KY409062. 1 | J2b1a | Sardinia | Europe | Olivieri et al., 2017 |
| KY409064. 1 | J2b1a | Sardinia | Europe | Olivieri et al., 2017 |
| KY409077. 1 | J2b1a | Sardinia | Europe | Olivieri et al., 2017 |
| KY409095. 1 | J2b1a | Sardinia | Europe | Olivieri et al., 2017 |
| KY409114. 1 | J2b1a | Sardinia | Europe | Olivieri et al., 2017 |
| KY409118. 1 | J2b1a | Sardinia | Europe | Olivieri et al., 2017 |
| KY409139. 1 | J2b1a | Sardinia | Europe | Olivieri et al., 2017 |
| KY409149. 1 | J2b1a | Sardinia | Europe | Olivieri et al., 2017 |
| KY409202. 1 | J2b1a | Sardinia | Europe | Olivieri et al., 2017 |
| KY409316. 1 | J2b1a | Sardinia | Europe | Olivieri et al., 2017 |
| KY409330. 1 | J2b1a | Sardinia | Europe | Olivieri et al., 2017 |
| KY409435. 1 | J2b1a | Sardinia | Europe | Olivieri et al., 2017 |
| KY409470. 1 | J2b1a | Sardinia | Europe | Olivieri et al., 2017 |
| KY409521. 1 | J2b1a | Sardinia | Europe | Olivieri et al., 2017 |
| KY409688. 1 | J2b1a | Sardinia | Europe | Olivieri et al., 2017 |
| KY409706. 1 | J2b1a | Sardinia | Europe | Olivieri et al., 2017 |
| KY409769. 1 | J2b1a | Sardinia | Europe | Olivieri et al., 2017 |
| KY409828. 1 | J2b1a | Sardinia | Europe | Olivieri et al., 2017 |

|                    |       |                      |                            |                         |
|--------------------|-------|----------------------|----------------------------|-------------------------|
| KY409831. 1        | J2b1a | Sardinia             | Europe                     | Olivieri et al., 2017   |
| KY409967. 1        | J2b1a | Sardinia             | Europe                     | Olivieri et al., 2017   |
| KY410016. 1        | J2b1a | Sardinia             | Europe                     | Olivieri et al., 2017   |
| KY410037. 1        | J2b1a | Sardinia             | Europe                     | Olivieri et al., 2017   |
| KY410114. 1        | J2b1a | Sardinia             | Europe                     | Olivieri et al., 2017   |
| KY410121. 1        | J2b1a | Sardinia             | Europe                     | Olivieri et al., 2017   |
| KY410151. 1        | J2b1a | Sardinia             | Europe                     | Olivieri et al., 2017   |
| KY410222. 1        | J2b1a | Sardinia             | Europe                     | Olivieri et al., 2017   |
| KY670914. 1        | J2b1a | Russia               | Eastern Europe and Siberia | Malyarchuk et al., 2017 |
| <i>MF498701. 1</i> | J2b1a | Germany              | Europe                     | Knipper et al., 2017    |
| <i>MF991442. 1</i> | J2b1a | Spain                | Europe                     | Fregel et al., 2018     |
| <i>MF991447. 1</i> | J2b1a | Spain                | Europe                     | Fregel et al., 2018     |
| MK239957. 1        | J2b1a | Ireland              | Europe                     | Greenspan, FTDNA        |
| HG00106            | J2b1a | England and Scotland | Europe                     | Sudmant et al., 2015    |
| <i>I1109</i>       | J2b1  | Bulgaria             | Eastern Europe and Siberia | Mathieson et al., 2018  |
| <i>I2216</i>       | J2b1  | Bulgaria             | Eastern Europe and Siberia | Mathieson et al., 2018  |
| <i>KX354973. 1</i> | J2b1  | Italy                | Europe                     | Modi et al., 2017       |
| <i>LHSZ5</i>       | J2b1  | Hungary              | Europe                     | Vai et al., 2019        |
| <i>SZ5</i>         | J2b1  | Hungary              | Europe                     | Amorim et al., 2018     |

---

## REFERENCES

Amorim CEG, Vai S, Posth C, Modi A, Koncz I, Hakenbeck S, et al. 2018. Understanding 6th-century barbarian social organization and migration through paleogenomics. *Nature Communications*, **9**(1): 3547.

Behar DM, van Oven M, Rosset S, Metspalu M, Loogvali EL, Silva NM, et al. 2012. A “Copernican” reassessment of the human mitochondrial DNA tree from its root. *The*

*American Journal of Human Genetics*, **90**(4): 675–684.

Carelli V, Achilli A, Valentino ML, Rengo C, Semino O, Pala M, et al. 2006. Haplogroup effects and recombination of mitochondrial DNA: novel clues from the analysis of Leber hereditary optic neuropathy pedigrees. *The American Journal of Human Genetics*, **78**(4): 564–574.

Fraumene C, Belle EMS, Castri L, Sanna S, Mancosu G, Cosso M, et al. 2006. High resolution analysis and phylogenetic network construction using complete mtDNA sequences in Sardinian genetic isolates. *Molecular Biology and Evolution*, **23**(11): 2101–2111.

Fregel R, Méndez FL, Bokbot Y, Martín-Socas D, Camalich-Massieu MD, Santana J, et al. 2018. Ancient genomes from North Africa evidence prehistoric migrations to the Maghreb from both the Levant and Europe. *Proceedings of the National Academy of Sciences of the United States of America*, **115**(26): 6774–6779.

Greenspan B. Direct submission. Family Tree DNA. <http://www.ncbi.nlm.nih.gov/>.

Hartmann A, Thieme M, Nanduri LK, Stempfl T, Moehle C, Kivisild T, et al. 2009. Validation of microarray-based resequencing of 93 worldwide mitochondrial genomes. *Human Mutation*, **30**(1): 115–122.

Just RS, Scheible MK, Fast SA, Sturk-Andreaggi K, Röck AW, Bush JM, et al. 2015. Full mtGenome reference data: Development and characterization of 588 forensic-quality haplotypes representing three U.S. populations. *Forensic Science International: Genetics*, **14**: 141–155.

Knipper C, Mittnik A, Massy K, Kociumaka C, Kucukkalipci I, Maus M, et al. 2017. Female exogamy and gene pool diversification at the transition from the Final Neolithic to the Early Bronze Age in central Europe. *Proceedings of the National Academy of Sciences of the United States of America*, **114**(38): 10083–10088.

Li ST, Besenbacher S, Li YR, Kristiansen K, Grarup N, Albrechtsen A, et al. 2014. Variation and association to diabetes in 2000 full mtDNA sequences mined from an exome study in a Danish population. *European Journal of Human Genetics*, **22**(8): 1040–1045.

Lippold S, Xu HY, Ko A, Li MK, Renaud G, Butthof A, et al. 2014. Human paternal and maternal demographic histories: insights from high-resolution Y chromosome and mtDNA sequences. *Investigative Genetics*, **5**(1): 13.

Malyarchuk B, Litvinov A, Derenko M, Skonieczna K, Grzybowski T, Grosheva A, et al. 2017. Mitogenomic diversity in Russians and Poles. *Forensic Science International: Genetics*, **30**: 51–56.

Mathieson I, Alpaslan-Roodenberg S, Posth C, Szécsényi-Nagy A, Rohland N, Mallick S, et al. 2018. The genomic history of southeastern Europe. *Nature*, **555**(7695): 197–203.

Modi A, Tassi F, Susca RR, Vai S, Rizzi E, De Bellis G, et al. 2017. Complete mitochondrial sequences from Mesolithic Sardinia. *Scientific Reports*, **7**(1): 42869.

- Pacheu-Grau D, Gómez-Durán A, Iglesias E, López-Gallardo E, Montoya J, Ruiz-Pesini E. 2013. Mitochondrial antibiograms in personalized medicine. *Human Molecular Genetics*, **22**(6): 1132–1139.
- Pala M, Olivieri A, Achilli A, Accetturo M, Metspalu E, Reidla M, et al. 2012. Mitochondrial DNA signals of late glacial recolonization of Europe from near eastern refugia. *The American Journal of Human Genetics*, **90**(5): 915–924.
- Pereira JB, Costa MD, Vieira D, Pala M, Bamford L, Harich N, et al. 2017. Reconciling evidence from ancient and contemporary genomes: a major source for the European Neolithic within Mediterranean Europe. *Proceedings of the Royal Society B: Biological Sciences*, **284**(1851): 20161976.
- Raule N, Sevini F, Li ST, Barbieri A, Tallaro F, Lomartire L, et al. 2014. The co-occurrence of mtDNA mutations on different oxidative phosphorylation subunits, not detected by haplogroup analysis, affects human longevity and is population specific. *Aging Cell*, **13**(3): 401–407.
- Sudmant PH, Rausch T, Gardner EJ, Handsaker RE, Abyzov A, Huddleston J, et al. 2015. An integrated map of structural variation in 2,504 human genomes. *Nature*, **526**(7571): 75–81.
- Vai S, Brunelli A, Modi A, Tassi F, Vergata C, Pilli E, et al. 2019. A genetic perspective on Longobard-Era migrations. *European Journal of Human Genetics*, **27**(4): 647–656.

Supplementary Figures



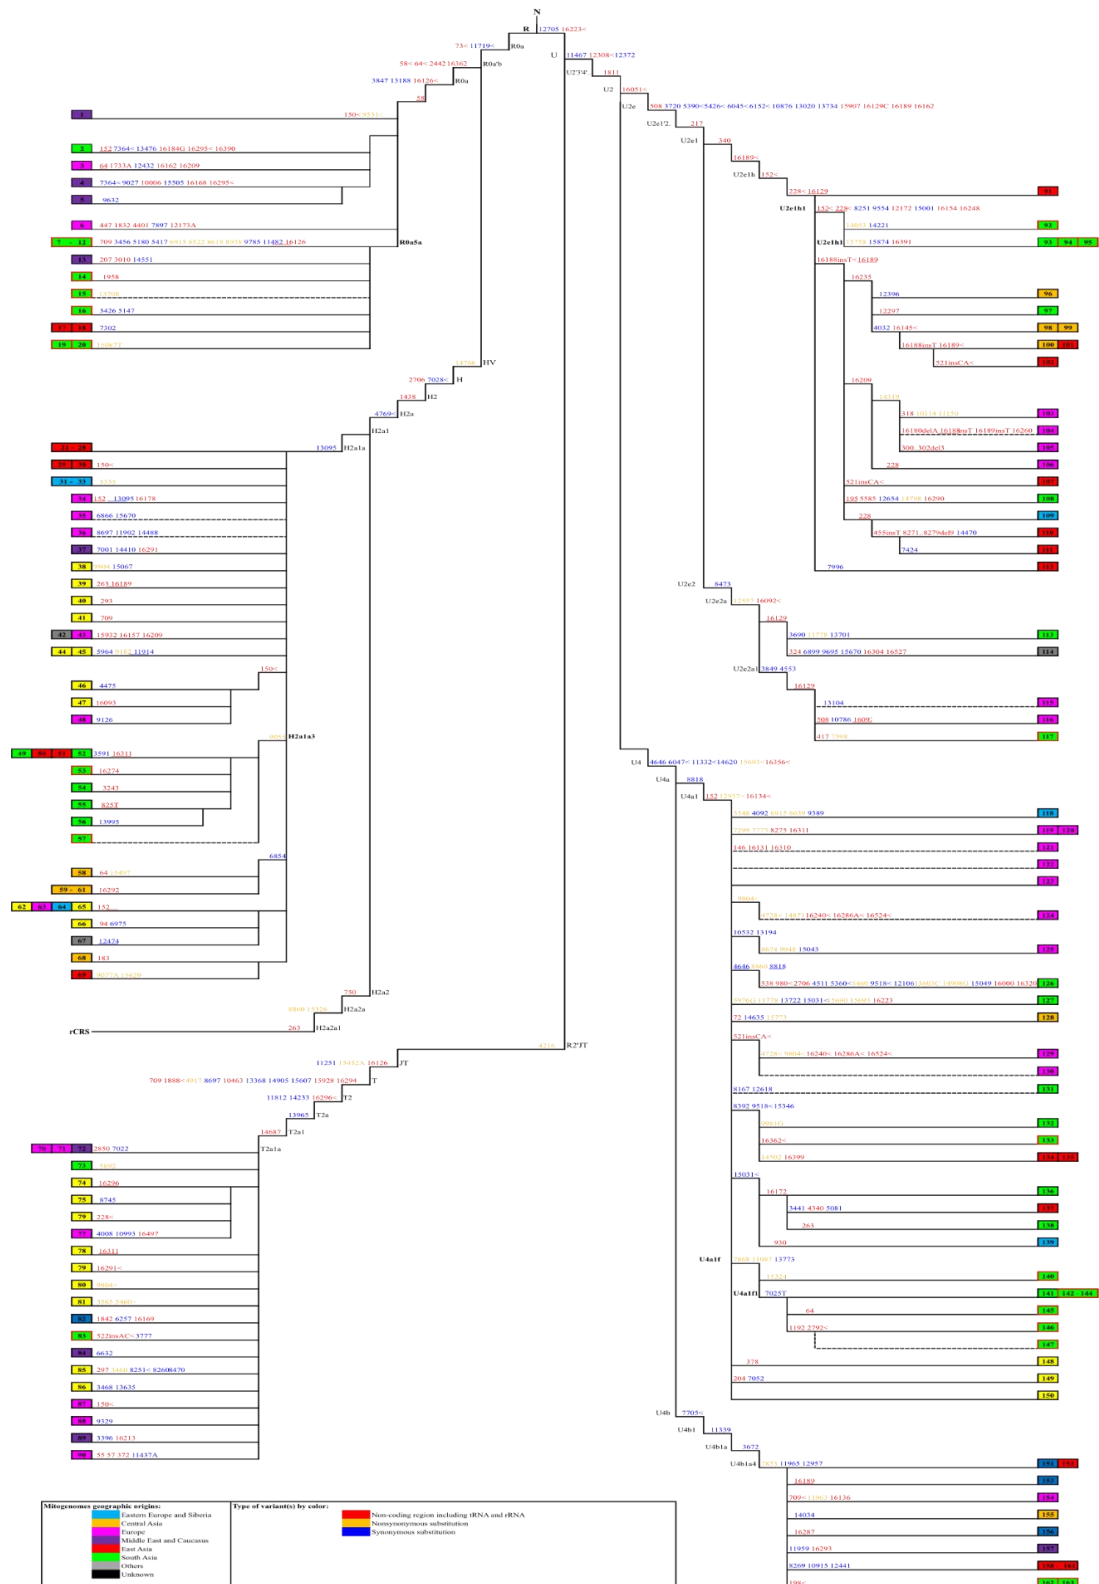

**Supplementary Figure S1** Maximum-parsimony phylogenetic reconstruction of haplogroups identified in Kalash population together with available mitogenome data from our unpublished work and literature. Geographic affiliation of sequences is represented by different colors, as shown in legend. Mutations are shown on tree branches relative to the

rCRS, and recurrent mutations are shown with underlined numbers. Each square block corresponds to a mitogenome sequence with the codes correspond to those in Supplementary Table S2; Kalash sequences are enclosed in red squares. Newly defined haplogroups in our study are in bold. Sequences from outside Eurasia are labeled as “Others” in brown; sequences of unknown origin are labeled as “Unknown” in yellow. Types of variants are shown in different colors, as defined in the figure legend. All transversions are shown with their respective nucleotide types. Branches with incomplete mitogenome sequence(s) with gap(s) are shown with dotted lines and their positions in the tree are uncertain.

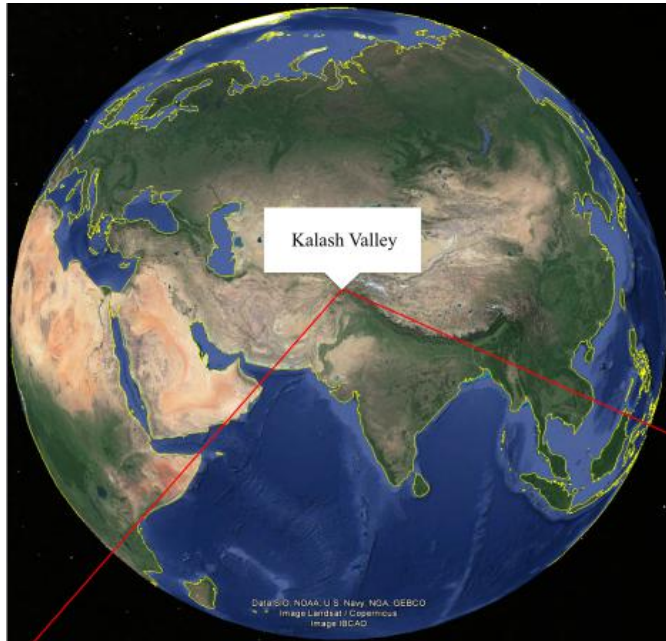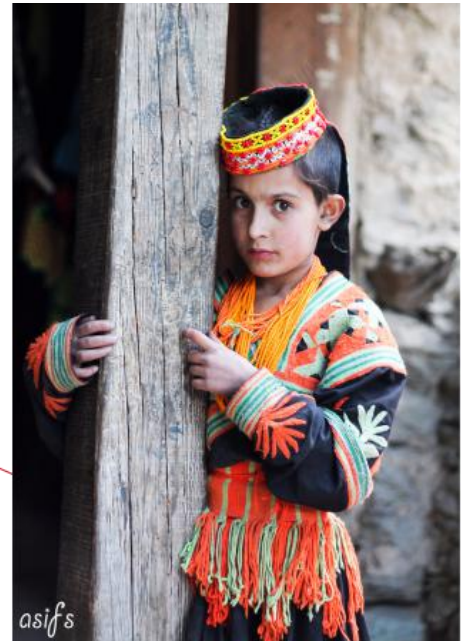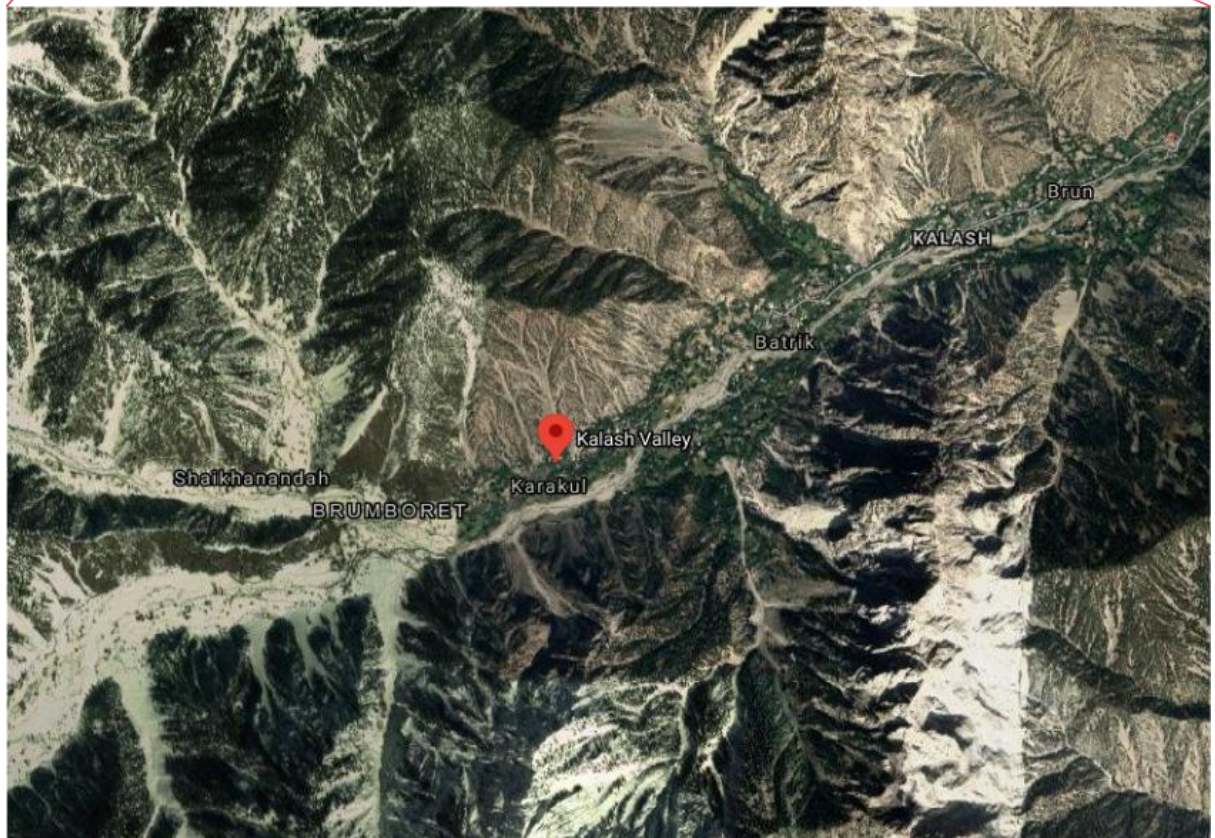

**Supplementary Figure S2** Sampling locations in Kalash valleys of northern Pakistan are pinned on the map. Upper right inset shows a Kalash child in traditional Kalash dress (photo reproduced from <https://www.flickr.com/> with author's permission).
